# Supplementary material
Source: PubMed Central journal article supplement (PMC3716076)
Supplement: JCM.00075-13_zjm999092532so1.pdf [file JCM.00075-13_zjm999092532so1.pdf]

Becker et al.

Evaluation of a modular multiplex-PCR methicillin-resistant *Staphylococcus aureus* (MRSA) detection assay adapted for *mecC* detection

**Suppl. Table 1.** Origin and characteristics of the *S. aureus* isolates tested

| <b><i>S. aureus</i> group</b>     | <b>Origin</b> | <b>Host</b> | <b><i>spa</i>-types</b>                                                                                                                                                                                                                                                                                                                                                                                                                 |
|-----------------------------------|---------------|-------------|-----------------------------------------------------------------------------------------------------------------------------------------------------------------------------------------------------------------------------------------------------------------------------------------------------------------------------------------------------------------------------------------------------------------------------------------|
| <b>(number of isolates)</b>       |               |             |                                                                                                                                                                                                                                                                                                                                                                                                                                         |
| MSSA<br>(n = 50)                  | Germany       | Human       | t002, t005, t008, t015, t021, t024, t056, t084, t091, t097, t122, t156, t159, t160, t166, t177, t213, t216, t223, t230, t252, t331, t360, t362, t605, t1156, t1238, t2364, t3423, t3583, t4230, t4629, t4904, t5160, t9813, t10327, t10353, t10354, t10356 and t10388                                                                                                                                                                   |
| MRSA ( <i>mecA</i> )<br>(n = 240) | Germany       | Human       | t001, t002, t005, t008, t014, t016, t019, t020, t021, t024, t025, t027, t030, t032, t037, t038, t040, t041, t044, t063, t068, t091, t105, t108, t114, t121, t122, t127, t141, t148, t160, t189, t197, t223, t264, t283, t330, t355, t379, t432, t437, t456, t457, t458, t531, t541, t548, t578, t646, t655, t657, t692, t739, t785, t791, t852, t904, t934, t967, t1015, t1214, t1302, t1328, t1372, t1430, t1451, t1616, t1617, t1627, |

---

|                                  |                                                 |                            |                                                                                                                                                                                                                                                                                                                                                                                                                                                                                                                                              |
|----------------------------------|-------------------------------------------------|----------------------------|----------------------------------------------------------------------------------------------------------------------------------------------------------------------------------------------------------------------------------------------------------------------------------------------------------------------------------------------------------------------------------------------------------------------------------------------------------------------------------------------------------------------------------------------|
|                                  |                                                 |                            | t1733, t1779, t2164, t2231, t2251, t2477,<br>t2516, t2518, t2533, t2576, t2642, t2818,<br>t2834, t2860, t3050, t3139, t3561, t3618,<br>t3721, t3948, t4100, t4133, t4184, t4217,<br>t4395, t4417, t4424, t4450, t4582, t4741,<br>t4762, t4881, t4897, t5160, t5397, t5599,<br>t6257, t6548, t6704, t6736, t6846, t6860,<br>t7239, t7240, t7391, t7634, t7635, t7656,<br>t8038, t8039, t8221, t8357, t8358, t8359,<br>t8361, t8362, t8364, t8365, t8366, t8367,<br>t8368, t8370, t8371, t8373, t8374, t8375,<br>t8376, t8377, t8378 and t9553 |
| MRSA ( <i>mecC</i> )<br>(n = 41) | Denmark,<br>Germany,<br>Netherlands and<br>U.K. | Human,<br>bovine,<br>ovine | t373, t528, t843, t978, t1532, t1535, t1736,<br>t1773, t2345, t3218, t3256, t3391, t3570 and<br>t5930                                                                                                                                                                                                                                                                                                                                                                                                                                        |

---
